# Aerosphere occupancy ( $\psi$ ) model of lesser short nosed fruit bat (*Cynopterus brachyotis* Muller, 1838) related to tree species in Asia mountainous paddy fields

ADI BASUKRIADI<sup>1</sup>, ERWIN NURDIN<sup>1</sup>, ANDRI WIBOWO<sup>1,\*</sup>, JIMI GUNAWAN<sup>1</sup>

<sup>1</sup>Biology Department, Faculty of Mathematics and Natural Sciences, Universitas Indonesia, 16424, Depok, West Java, Indonesia, email: andriwibowocbc@gmail.com

**Abstract.** Bat is animal that occupies aerosphere, especially fruit bats that forage on the space around the trees. The fruit bats use whether narrow space below tree canopy or in edge space on the edge of canopy. Whereas the aerosphere occupancy of fruits bats related to the specific tree species is poorly understood. Here, this paper aims to assess and model the association of fruit bat *Cynopterus brachyotis* aerosphere occupancy ( $\psi$ ) with tree species planted in mountainous paddy fields in West Java. The studied tree species including *Alianthus altissima*, *Acacia* sp., *Cocos nucifera*, *Mangifera indica*, *Pinus* sp., and *Swietenia macrophylla*. The result shows that the tree species diversity has significantly ( $\chi^2 = 27.67$ ,  $P < 0.05$ ) affected the *C. brachyotis* aerosphere occupancy. According to values of  $\psi$  and occupancy percentage, high occupancy of narrow space by *C. brachyotis* was observed in *Swietenia macrophylla* ( $\psi = 0.934$ , 78%), followed by *Alianthus altissima* ( $\psi = 0.803$ , 57%), and *Mangifera indica* ( $\psi = 0.913$ , 55%). While high occupancy of edge space was observed in *Mangifera indica* ( $\psi = 0.685$ , 41%), followed by *Pinus* sp. ( $\psi = 0.674$ , 38%), and *Alianthus altissima* sp. ( $\psi = 0.627$ , 36%). The best model for explaining *C. brachyotis* occupation in narrow space is the tree height with preferences on high tree ( $\psi \sim$  tree height, AIC = 1.574,  $R^2 = 0.5535$ , Adj. R = 0.4047). While for edge space occupant, the best model is also the tree height ( $\psi \sim$  tree height, AIC = -26.1510,  $R^2 = 0.7944$ , Adj. R = 0.7258).

**Key words:** bat, model, occupancy,  $\psi$ , tree.

**Abbreviations:** AIC (Akaike Information Criterion)

## INTRODUCTION

Bat assemblages are influenced by the differential uses of the aerosphere that can be classified into 3 spaces (Figure 1) and habitat types including open space that far away from obstacles or the ground, edge space close to, but not within, vegetation or above water, and narrow space within vegetation and under the canopy layer. Each of these space partitions of the aerosphere related to particular adaptations in shape of the wings and in design of echolocation calls. Bats flying and using open space are characterized by long and narrow wings (Marinello and Bernard 2014, Norberg and Rayner 1987) that permit fast flight. This bat species usually has low frequency and narrowband echolocation calls that are an adaptation for long-range detection of insects. Bats hunting closer to obstacles, foliage, and using narrow space are characterized by broader and somewhat shorter wings. Echolocation calls have higher frequency. Wing shapes of bats that mostly fly within the forest and use narrow space under tree canopy are broad and short to allow skilful maneuvering around obstacles and tree branches (Schnitzler and Kalko 2001, Korine and Kalko 2005).

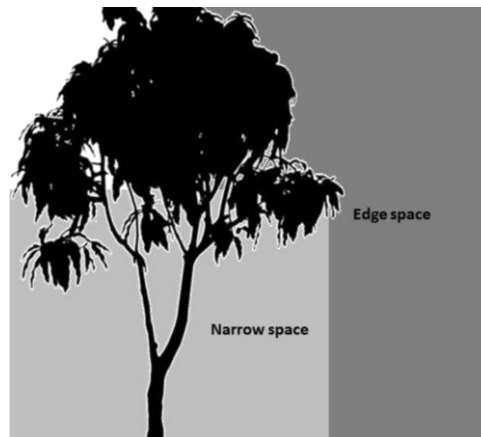

**Figure 1.** Space use of bats, narrow space is space under tree canopy and edge space is space on the edge of tree canopy.

Bat and tree species preferences are widely studied whereas the exact space occupancy of bats related to the particular tree species is still poorly understood. Asia is one of region that has high diverse of tree species that is important to support

52 the arboreal bats including fruit bat *C. brachyotis*. Here this paper aims to model the *C. brachyotis* occupancy on space  
53 surrounding trees.

## 54 MATERIALS AND METHODS

### 55 Study area

56 This study was conducted in mountainous landscape located in Nagreg region in West Java Province, Indonesia. This  
57 landscape was dominated by mix of paddy fields, plantations, and settlements (Figure 2). The elevation was between 718  
58 to 728 m above sea levels. In this study area, 3 transects with length of each transect was 1 km were located. The fruit bat,  
59 vegetation structure and aerosphere variable surveys were conducted in those transects in August 2020.  
60  
61

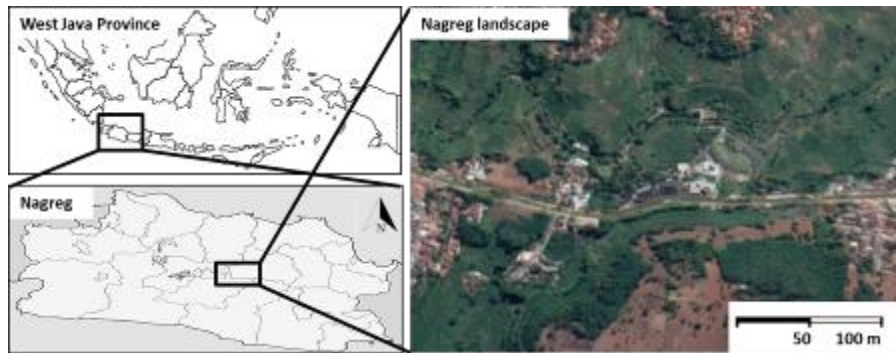

62  
63 **Figure 2.** Location of study area in Nagreg landscape in West Java Province, Indonesia.  
64

### 65 Method

#### 66 *Tree species assemblage surveys*

67 Tree surveys were conducted in August 2020 following the fruit bat surveys from 17.00 to 19.00. The trees that were  
68 passed and perched by bats were recorded. The recorded variables were including tree species, tree canopy cover and  
69 height. The surveys were conducted within a square plot sizing 10 m x 10 m standardized for tree surveys.  
70

#### 71 *Cynopterus brachyotis* surveys

72 *C. brachyotis* observations were conducted following methods as described by several authors. The observations were  
73 conducted at noon from 17.00 to 19.00 following *C. brachyotis* activity times within 10 m x 10 m grid in each sampling  
74 location. *C. brachyotis* were recorded and denoted as presence and absence data with 3 sampling event replications. *C.*  
75 *brachyotis* observations were emphasizing on bat presences in space below the tree canopy (narrow space) and space on  
76 the edge of tree canopy (edge space).  
77

### 78 Data analysis

79 Aerosphere occupancy analysis was following Coleman et al. (2014) and Starbuck et al. (2015). The occupancy  
80 analysis was performed upon comparisons of events with presences of bats and total sampling events. The occupancy  
81 variables were denoted as occupancy ( $\psi$ ), occupancy percentage (%), detection probability ( $p$ ) and naïve estimates. The  
82 occupancy analyses were performed to compare bat presence in narrow and edge spaces as functions of tree species. The  
83 significance difference of bat occupancy affected by tree species was analyzed using  $\chi^2$  test with significance level at  
84  $P < 0.05$ .

85 Occupancy model as functions of tree cover and height was developed using Akaike Information Criterion (AIC). The  
86 AIC was developed using the linear regression. The measured parameters included in AIC are  $R^2$  and adjusted  $R^2$ . To build  
87 the model, 2 explanatory covariates including tree covers in %/100 m<sup>2</sup>, tree heights and combinations of those covariates  
88 were included in the analysis to develop the model.

## RESULTS AND DISCUSSION

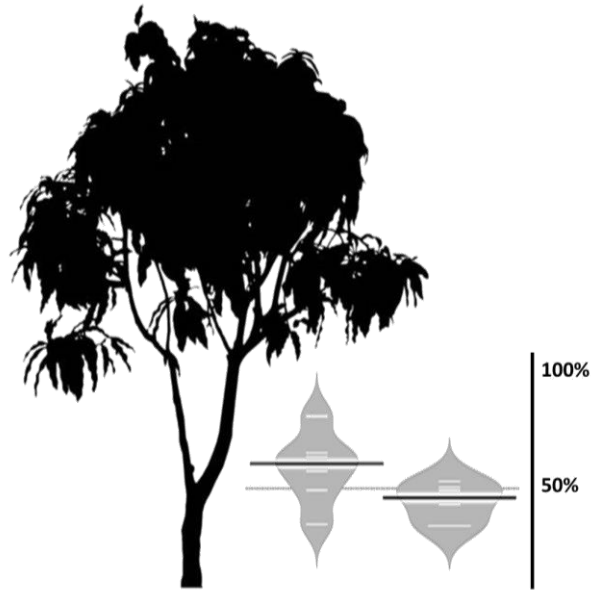

**Figure 3.** Space occupancy percentage of *C. brachyotis* and comparison between narrow and edge spaces ( $\chi^2 = 27.67$ ,  $P < 0.05$ ).

**Table 1.** Values of habitat occupancy ( $\psi$ ), detection probability ( $p$ ) and occupancy percentage of fruit bat *Cynopterus brachyotis* in *Alianthus altissima*, *Acacia* sp., *Cocos nucifera*, *Mangifera indica*, *Pinus* and *Swietenia macrophylla* trees. Superscript numbers in bracket show order of values from high to low.

| Tree species                 | Aerosphere | $\psi$ | $p$   | Naive | % occupancy        |
|------------------------------|------------|--------|-------|-------|--------------------|
| <i>Alianthus altissima</i>   | Narrow     | 0.803  | 0.520 | 0.714 | 57% <sup>(2)</sup> |
|                              | Edge       | 0.627  | 0.533 | 0.571 | 36% <sup>[3]</sup> |
| <i>Acacia</i> sp.            | Narrow     | 0.764  | 0.433 | 0.625 | 47%                |
|                              | Edge       | 0.428  | 0.5   | 0.375 | 16%                |
| <i>Cocos nucifera</i>        | Narrow     | 0.392  | 0.46  | 0.444 | 17%                |
|                              | Edge       | 0.631  | 0.33  | 0.444 | 28%                |
| <i>Mangifera indica</i>      | Narrow     | 0.913  | 0.300 | 0.600 | 55% <sup>(3)</sup> |
|                              | Edge       | 0.685  | 0.500 | 0.600 | 41% <sup>[1]</sup> |
| <i>Pinus</i> sp.             | Narrow     | 0.627  | 0.533 | 0.571 | 36%                |
|                              | Edge       | 0.674  | 0.466 | 0.571 | 38% <sup>[2]</sup> |
| <i>Swietenia macrophylla</i> | Narrow     | 0.934  | 0.523 | 0.833 | 78% <sup>(1)</sup> |
|                              | Edge       | 0.473  | 0.333 | 0.333 | 16%                |

**Table 2.** Selected occupancy model (asterisk signs) of fruit bat *Cynopterus brachyotis* with tree cover-height covariates.

| Model                                                          | AIC      | R <sup>2</sup> | Adj R <sup>2</sup> | Residual |
|----------------------------------------------------------------|----------|----------------|--------------------|----------|
| ( $\Psi$ ) <sub>narrow space</sub> (~tree cover)               | 5.371    | 0.04594        | -0.2721            | 0.2933   |
| ( $\Psi$ ) <sub>narrow space</sub> (~tree height)              | 1.574*   | 0.5535         | 0.4047             | 0.2007   |
| ( $\Psi$ ) <sub>narrow space</sub> (~tree cover)( tree height) | 2.372    | 0.6489         | 0.2978             | 0.2179   |
| ( $\Psi$ ) <sub>edge space</sub> (~tree cover)                 | -18.254  | 0.002253       | -0.3303            | 0.02763  |
| ( $\Psi$ ) <sub>edge space</sub> (~tree height)                | -26.151* | 0.7944         | 0.7258             | 0.01254  |
| ( $\Psi$ ) <sub>narrow space</sub> (~tree cover))(tree height) | -22.61   | 0.7207         | 0.4413             | 0.0179   |

## 104 Space occupancy selection

105 There were 6 tree species preferred by *C. brachyotis* including *Alianthus altissima*, *Acacia* sp., *Cocos nucifera*,  
106 *Mangifera indica*, *Pinus* sp., and *Swietenia macrophylla*. In those tree species, *C. brachyotis* was observed foraging in  
107 edge space and narrow space. The results show that *C. brachyotis* use narrow space more frequently than edge space  
108 (Figure 3). The space uses were affected ( $\chi^2 = 27.67$ ,  $P < 0.05$ ) by tree species. According to values of  $\psi$  and occupancy  
109 percentage, high occupancy of narrow space by *C. brachyotis* was observed in *Swietenia macrophylla* ( $\psi = 0.934$ , 78%),  
110 followed by *Alianthus altissima* ( $\psi = 0.803$ , 57%), and *Mangifera indica* ( $\psi = 0.913$ , 55%). While high occupancy of edge  
111 space was observed in *Mangifera indica* ( $\psi = 0.685$ , 41%), followed by *Pinus* sp. ( $\psi = 0.674$ , 38%), and *Alianthus*  
112 *altissima* sp. ( $\psi = 0.627$ , 36%) (Table 1). The best model for explaining *C. brachyotis* occupation in narrow space is the  
113 tree height with preferences on high tree ( $\psi$ ~tree height, AIC = 1.574,  $R^2 = 0.5535$ , Adj. R = 0.4047). While for edge space  
114 occupant, the best model is also the tree height ( $\psi$ ~tree height, AIC = -26.1510,  $R^2 = 0.7944$ , Adj. R = 0.7258) (Table 2).  
115

## 116 Discussion

117 The results show significant occupancy of fruit bat on narrow space below canopy. This space was known preferred by  
118 bat species. Kalko and Handley (2001) observed that canopy has more bat species with the canopy rigs yielded more  
119 species ( $n = 41$ ) than the ground nets ( $n = 35$ ). Bats known use the canopy for a variety of purposes including roosting,  
120 foraging, and reproduction. The use of canopy was 76% for roosting and 85% for foraging (Wunder and Carey 1996). A  
121 space below canopy tree provides several features that can support the bats. Those features are including tree cavities and  
122 foliage. Tree cavities used by bats including hollows formed in the trunks or branches of snags or damaged live trees. Tree  
123 cavities generally provide a relatively stable microclimate and offer protection from predators. Several factors influencing  
124 bat occupancies in space below canopy are microclimate, structure, tree age, size, and height. The most important features  
125 of narrow space are the foliage. Narrow space with its foliage above is generally well insulated against cold temperatures  
126 and reducing predator risks.

127 Whereas in our study, the *C. brachyotis* shows opposite patterns of space occupancy in one particular trees species. In  
128 contrast to other tree species, the space occupancy for *Cocos nucifera* was higher in edge rather than in narrow space.  
129 While in general, space occupancy of *C. brachyotis* were always higher in narrow space rather than in edge space. This  
130 condition was related to the morphology of *C. nucifera* tree in particular its canopy. This species is not belong to the hard  
131 wood species even it has height almost equal to other tree species. Since it is not belong to hard wood species, this species  
132 does not have canopy cover as dense as canopy cover belongs to hard wood species. Beside effects related to canopy  
133 covers, some bat species were observed preferring more edge space above canopy rather than narrow space below canopy.  
134 Menzel et al. (2005) reported that the mean of bat activities can be 3 folds greater in above canopy in comparison to  
135 activity in below canopy.

136 Bats in Nagreg landscape have high occupancy in mango (*Mangifera indica*) trees. The preferences of bats with mango  
137 trees observed in this study were in corroborated with results from other studies. Tollington et al. (2019) reported that the  
138 consumption of 31000 lychee fruits were 42% consumed by the Mauritius fruit bat (*Pteropus niger*). From 81 fruit tree  
139 species, mango is frequently consumed by bats (Aziz et al. 2016). In West Java regions, Suyanto (2002) reported that  
140 occupancy of *Cynopterus* spp. to certain tree species related to the foraging for leaves and fruits as these were main food  
141 sources for fruit bats.

142 In Nagreg, fruit bat also has high occupancy on other non-fruiting tree species other than mango. Soegiharto et al.  
143 (2010) have reported several vegetation species that may attract fruit bat presences. Those species were including families  
144 of Acanthaceae, Apocynaceae, Begoniaceae, Convolvulaceae, Paceae, Pinaceae, and Orchidaceae. The preferred species  
145 were *Anacardium* sp., *Adenantha* sp., *Syzygium* sp., *Anacardium* sp., *Annona* sp., *Ceiba* sp., *Eugenia* sp., *Hisbiscus* sp.  
146 , *Acacia* sp., *Cyathea* sp., *Salacia* sp., *Cyperus* sp., and *Croton* sp. In Nagreg, *Acacia* sp. was one of species occupied by *C.*  
147 *brachyotis* with low frequency. In the model, the tree height covariate was the best estimate for bat space occupancy. The  
148 converse correlation of height with bat activity was also reported in other studies. Muller et al. (2013) have observed that  
149 bat activity was correlated with height of tree.

150 Tree stands are important for bat population mainly fruit bats. Whereas rationale for selecting appropriate tree species  
151 is still challenging. Here this study has employed habitat occupancy method and model to assess tree species used mostly  
152 by fruit bats. To conclude, several tree species including *Alianthus altissima*, *Mangifera indica*, and *Swietenia*  
153 *macrophylla* are occupied more frequently by *C. brachyotis* including in their space below canopy and in their space on  
154 the edge of canopy.

## 155 REFERENCES

- 156 Aziz SA, Olival K.J, Bumrungsri S, Richards G, Racey PA. 2016. The Conflict Between Pteropodid Bats and Fruit Growers: Species,  
157 Legislation and Mitigation. In: Voigt C., Kingston T. (eds) Bats in the Anthropocene: Conservation of Bats in a Changing World.  
158 Springer, Cham
- 159 Coleman L, Ford W, Dobony C, Britzke E. 2014. Comparison of Radio-Telemetric Home-Range Analysis and Acoustic Detection for  
160 Little Brown Bat Habitat Evaluation. Northeastern Naturalist. 21. 431-445. 10.1656/045.021.0309.

- 161 Kalko EK and Handley CO. 2001. Neotropical bats in the canopy: diversity, community structure, and implications for conservation.  
162 Plant Ecology 153, 319–333
- 163 Korine C, Kalko EKV. 2005. Fruit detection and discrimination by small fruit-eating bats (Phyllostomidae): echolocation call design  
164 and olfaction. Behav Ecol Sociobiol 59:12–23
- 165 Marinello MM, Bernard E. 2014. Wing morphology of Neotropical bats: a quantitative and qualitative analysis with implications for  
166 habitat use. Canadian Journal of Zoology. 92.
- 167 Menzel JM, Menzel M, Kilgo JC. et al. 2005. Effect of habitat and foraging height on bat activity in the coastal plain of South Carolina J.  
168 Wild Manage. 69:2.
- 169 Müller J, Brandl R, Buchner J, Pretzsch H. et al. 2013. From ground to above canopy—Bat activity in mature forests is driven by  
170 vegetation density and height. Forest Ecology and Management 306 179-184.
- 171 Norberg U, Rayner J. 1987. Ecological Morphology and Flight in Bats (Mammalia; Chiroptera): Wing Adaptations, Flight Performance,  
172 Foraging Strategy and Echolocation. Royal Society of London Philosophical Transactions Series B. 316..
- 173 Schnitzler H-U, Kalko EKV. 2001. Echolocation by insect eating bats. Bioscience 51:557–69
- 174 Soegiharto S, Kartono AP, Maryanto I .2010. Pengelompokan Kelelawar Pemakan Buah dan Nektar Berdasarkan Karakteristik Jenis  
175 Pakan Polen di Kebun Raya Bogor, Indonesia. Jurnal Biologi Indonesia 6(2): 225-235
- 176 Suyanto A. 2002. Foraging behavior of *Cynopterus* spp. Zoo Indonesia. (29).
- 177 Starbuck CA, Amelon SK, Thompson F. 2015. Relationships Between Bat Occupancy and Habitat and Landscape Structure Along a  
178 Savanna, Woodland, Forest Gradient in the Missouri Ozarks. Wildlife Society Bulletin 39(1)
- 179 Tollington S, Kareemun Z, Augustin A, Lallchand K, Tatayah V, Zimmermann A. 2019. Quantifying the damage caused by fruit bats to  
180 backyard lychee trees in Mauritius and evaluating the benefits of protective netting. PLoS ONE 14(8)
- 181 Wunder L and Carey AB. 1996. Use of the Forest Canopy by Bats. Northwest Science 70.
- 182
